# Supplementary material for: Remediating Garden Soils: EDTA-Soil Washing and Safe Vegetable Production in Raised Bed Gardens
Source: MDPI journal article supplement (doi:10.3390/toxics10110652), 2022-10-29
Supplement: s1 [file s1]

# **Remediating Garden Soils: EDTA-Soil Washing and Safe Vegetable Production in Raised Bed Gardens**

Christoph Noller\*, Wolfgang Friesl-Hanl, Rebecca Hood-Nowotny, Andrea Watzinger

Department of Forest- and Soil Sciences, Institute of Soil Research, University of Natural Resources & Life Science (BOKU), 1180 Vienna, Austria

## **\*Corresponding author**

christoph.noller@boku.ac.at

University of Natural Resources and Life Sciences

Institute of Soil Research

Konrad-Lorenz-Strasse 24

1180 Vienna, Austria

|           | <b>Legend</b>                                                           | <b>Page</b> |
|-----------|-------------------------------------------------------------------------|-------------|
| Figure S1 | Construction of the raised bed experiment                               | 2           |
| Figure S2 | Homogenization of soil and application of amendments                    | 2           |
| Figure S3 | Toxicity symptoms and growth reduction of vegetables                    | 3           |
| Figure S4 | Spinach cultivars metal uptake                                          | 3           |
| Figure S5 | Radish cultivars metal uptake                                           | 4           |
| Figure S6 | Carrot cultivars metal uptake                                           | 4           |
| Figure S7 | Lettuce cultivars metal uptake                                          | 5           |
| Figure S8 | Yields of radish cultivars                                              | 5           |
| Table S1  | Chemical characteristics of the vermicompost amendment                  | 6           |
| Table S2  | Chemical characteristics of the biochar amendment                       | 6           |
| Table S3  | Measurement conditions for the atomic absorption spectroscopy           | 6           |
| Table S4  | Limit of detection for all elements measured using AAS-GF/F and ICP-OES | 6           |

## Supplementary

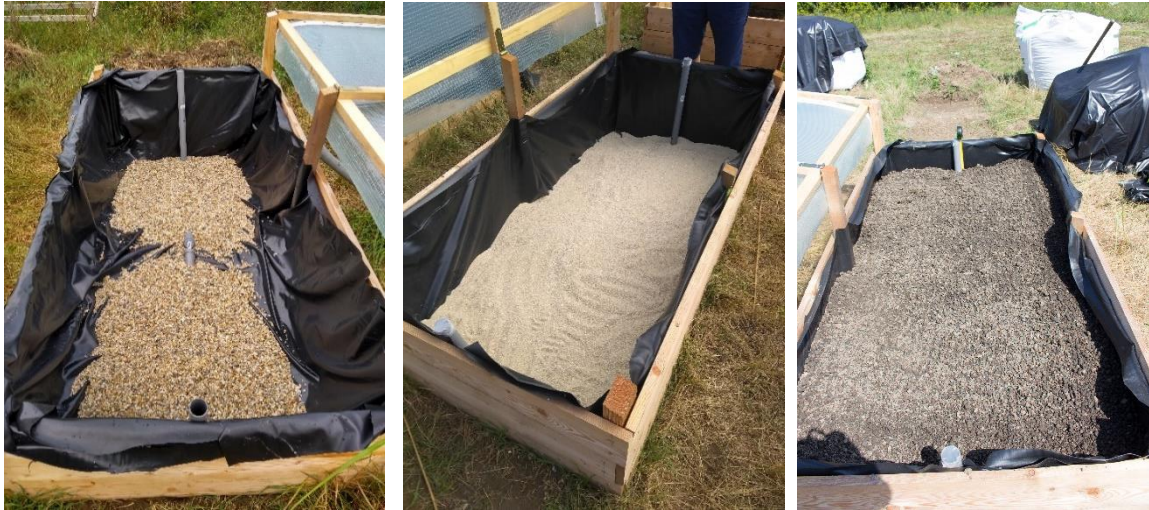

Figure S1: Filling of the raised beds: gravel layer (left), sand layer (middle), soil layer (right).

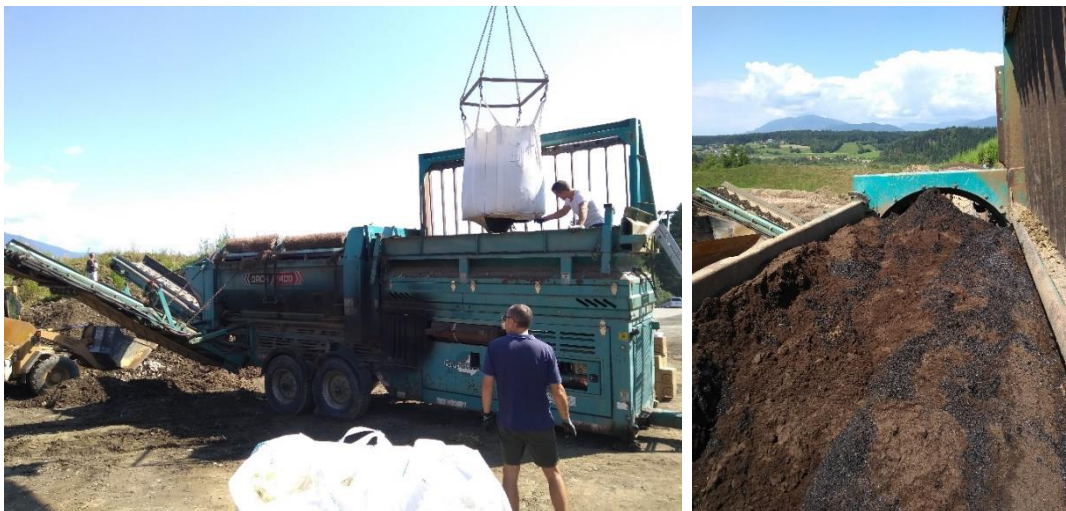

Figure S2: Trommel sieve for mixing the soils (left) and addition of the organic amendments (right).

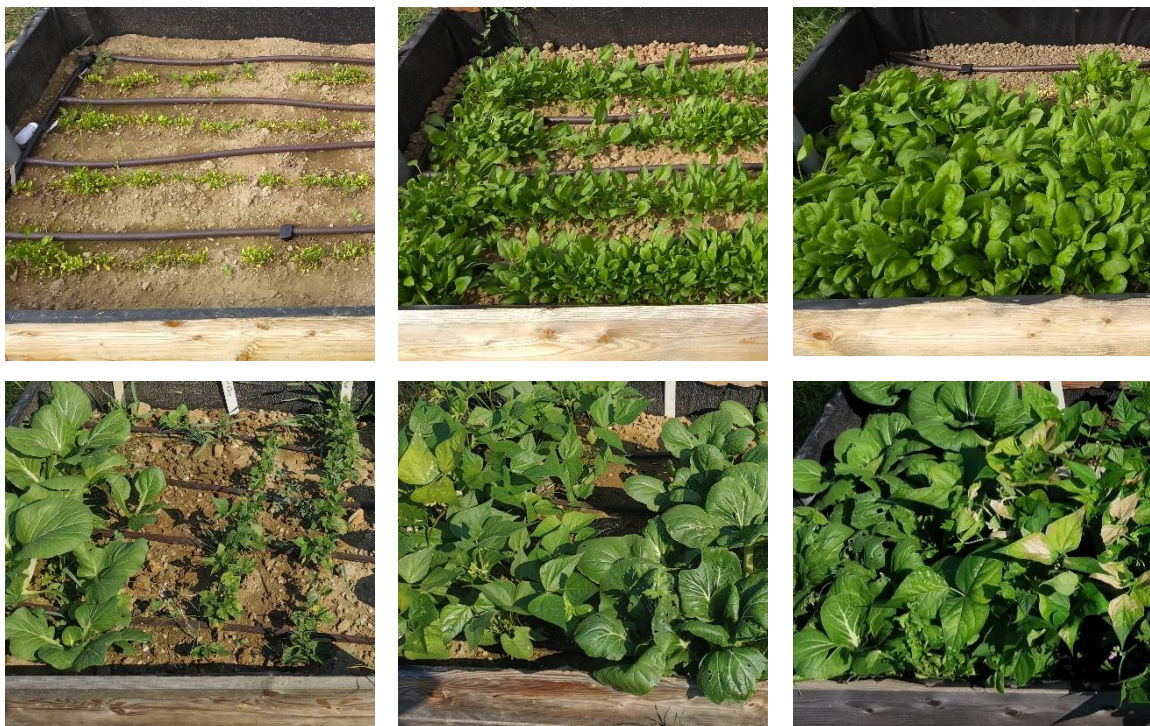

Figure S3: Spinach (upper row), bush beans and pak choi (lower row) before harvest. Plants in the contaminated soil (left column) showing toxicity symptoms and dwarfish growth, compared to the washed (middle row) and amended (right row) treatment.

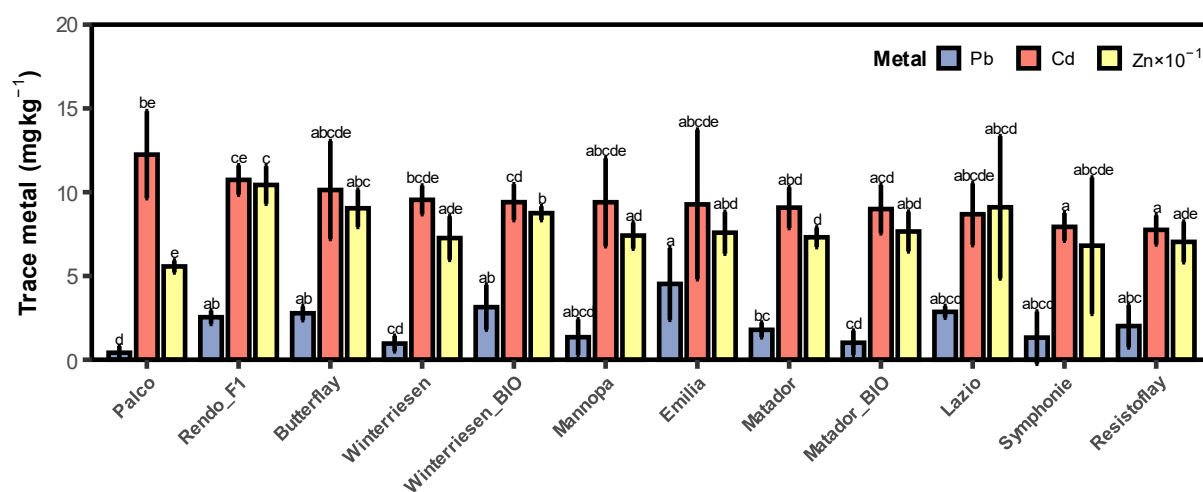

Figure S4: Uptake of heavy metals into spinach cultivars (mean  $\pm$  SD,  $n = 4$ ). Different lower-case letters indicate significant differences between cultivars.

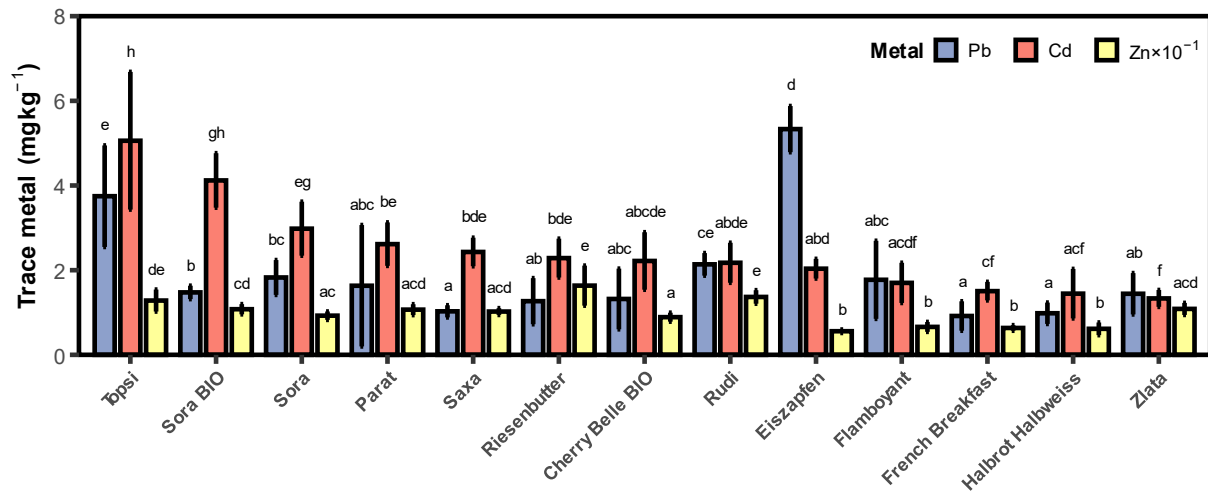

Figure S5: Uptake of heavy metals into radish cultivars (mean  $\pm$  SD,  $n = 4$ ). Different lower-case letters indicate significant differences between cultivars.

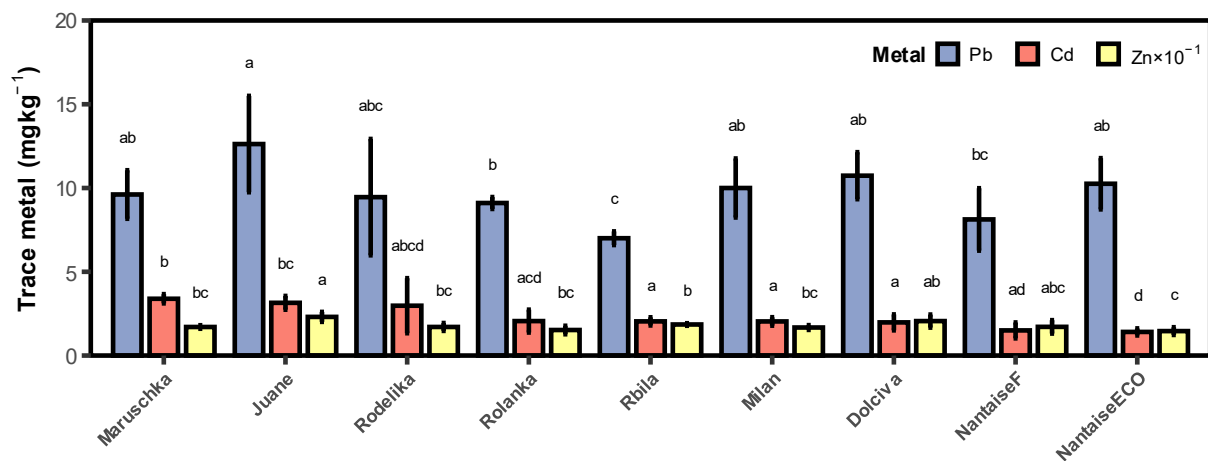

Figure S6: Uptake of heavy metals into carrot cultivars (mean  $\pm$  SD,  $n = 4$ ). Different lower-case letters indicate significant differences between cultivars.



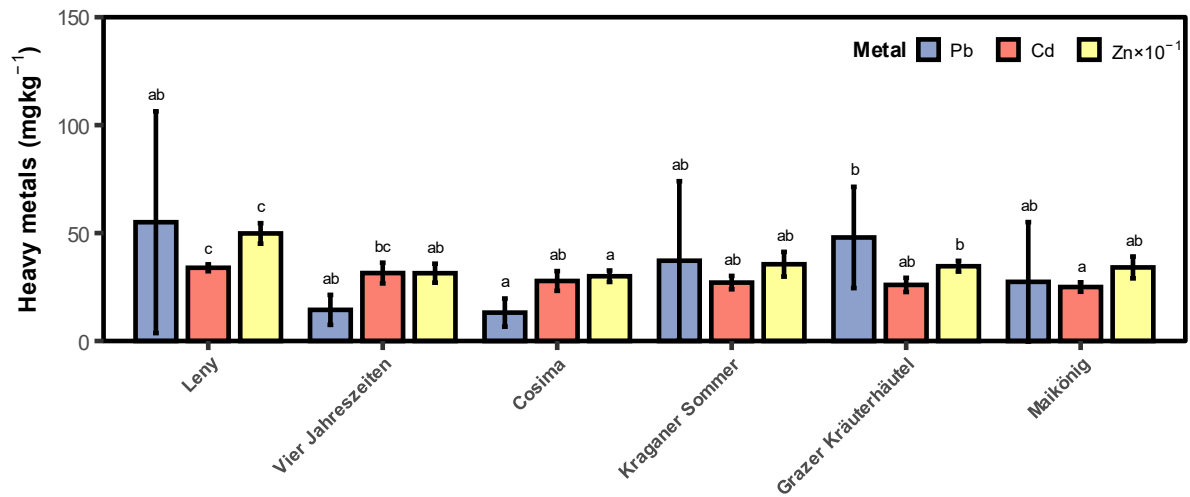

Figure S7: Uptake of heavy metals into lettuce cultivars (mean  $\pm$  SD,  $n = 4$ ). Different lower-case letters indicate significant differences between cultivars.

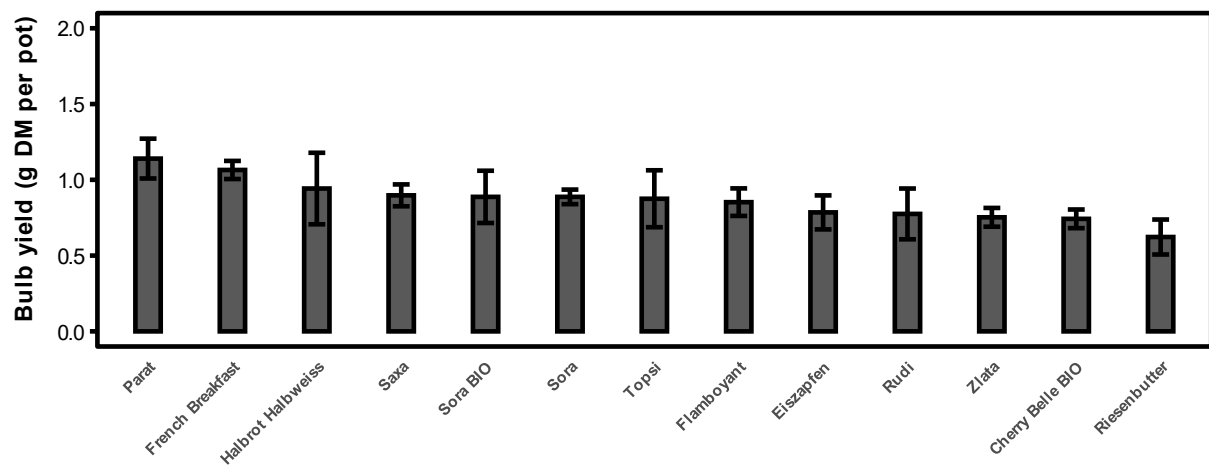

Figure S8: Yields of different radish cultivars (mean  $\pm$  SD,  $n = 4$ ).

Table S1: Chemical characteristics of the vermicompost amendment analyzed by EUROFINs Umweltanalytik GmbH.

| pH  | C <sub>org</sub> | N <sub>tot</sub> | P <sub>2</sub> O <sub>5</sub> | K <sub>2</sub> O   | MgO                | CaO                | NO <sub>3</sub>    | NH <sub>4</sub>    | Pb                  | Cd                  | Zn                  |
|-----|------------------|------------------|-------------------------------|--------------------|--------------------|--------------------|--------------------|--------------------|---------------------|---------------------|---------------------|
|     | %                | %                | g kg <sup>-1</sup>            | g kg <sup>-1</sup> | g kg <sup>-1</sup> | g kg <sup>-1</sup> | mg l <sup>-1</sup> | mg l <sup>-1</sup> | mg kg <sup>-1</sup> | mg kg <sup>-1</sup> | mg kg <sup>-1</sup> |
| 7.7 | 12.96            | 1.08             | 5.7                           | 14.5               | 14.1               | 61.7               | 5.99               | 121                | 15                  | 0.56                | 98                  |

Table S2: Physicochemical characteristics of the biochar amendment provided by the production company (Sonnenerde GmbH). Nutrients in biochar are mainly present in forms unavailable to plants.

| Organic C          | Total N            | H/C <sub>org</sub> ratio | P <sub>2</sub> O <sub>5</sub> | K <sub>2</sub> O   | MgO                | Surface area                   |
|--------------------|--------------------|--------------------------|-------------------------------|--------------------|--------------------|--------------------------------|
| g kg <sup>-1</sup> | g kg <sup>-1</sup> |                          | g kg <sup>-1</sup>            | g kg <sup>-1</sup> | g kg <sup>-1</sup> | m <sup>2</sup> g <sup>-1</sup> |
| 632                | 9.9                | 0.17                     | 56                            | 50                 | 31                 | 297                            |

Table S3: Measurement conditions for the atomic absorption spectroscopy.

| Element | Utility | Lamp | Background Correction | Matrix Modifier                                | Wavelength | Carbonization | Atomization | LOD                |
|---------|---------|------|-----------------------|------------------------------------------------|------------|---------------|-------------|--------------------|
|         |         |      |                       |                                                | nm         | °C            | °C          | mg L <sup>-1</sup> |
| Pb      | GF      | HCL  | D2                    | NH <sub>4</sub> H <sub>2</sub> PO <sub>4</sub> | 283.3      | 900           | 1900        | 0.5                |
| Cd      | GF      | HCL  | D2                    | Pd-Mg(NO <sub>3</sub> ) <sub>2</sub>           | 228.8      | 650           | 1600        | 0.06               |
| Zn      | F       | HCL  | D2                    | -                                              | 213.9      | -             | 2150-2300   | 2.2                |

Table S4: Limit of detection for all elements measured using AAS-GF/F and ICP-OES.

| Element | Technique | Wavelength (nm) | LOD (mg L <sup>-1</sup> ) |
|---------|-----------|-----------------|---------------------------|
| Pb      | AAS-GF    | 283.3           | 0.500                     |
| Cd      | AAS-GF    | 228.8           | 0.060                     |
| Zn      | AAS-F     | 213.9           | 2.200                     |
| Ca      | ICP-OES   | 317.933         | 0.126                     |
| Fe      | ICP-OES   | 238.204         | 0.043                     |
| K       | ICP-OES   | 766.490         | 0.341                     |
| Mg      | ICP-OES   | 285.213         | 0.030                     |
| Mn      | ICP-OES   | 257.610         | 0.005                     |
| P       | ICP-OES   | 589.592         | 0.382                     |
| Pb      | ICP-OES   | 214.914         | 0.178                     |
| Si      | ICP-OES   | 220.353         | 0.005                     |
| Zn      | ICP-OES   | 180.669         | 0.144                     |
